# Supplementary material for: Hemolytic disease of the fetus and newborn: systematic literature review of the antenatal landscape
Source: PubMed Central journal article supplement (PMC9824959; doi:10.1186/s12884-022-05329-z), 2023-01-07
Supplement: 12884_2022_5329_MOESM2_ESM.pdf [file 12884_2022_5329_MOESM2_ESM.pdf]

## Appendix S1. Search Strategy

| #  | Description                       | Search String                                                                                                                                                                                                                                                                                                                                                                                                                                                                                                                                                                                                                          | Hits                 |
|----|-----------------------------------|----------------------------------------------------------------------------------------------------------------------------------------------------------------------------------------------------------------------------------------------------------------------------------------------------------------------------------------------------------------------------------------------------------------------------------------------------------------------------------------------------------------------------------------------------------------------------------------------------------------------------------------|----------------------|
| S1 | Disease state                     | (EMB.EXACT.EXPLODE("newborn hemolytic disease") OR<br>MESH.EXACT.EXPLODE("Erythroblastosis, Fetal"))<br>AND (TI,AB(HDFN OR ((hemolytic OR haemolytic)<br>NEAR/3 (fetus OR newborn OR foetus)))) OR<br>TI,AB("hemolytic disease of the fetus and newborn"<br>OR "haemolytic disease of the fetus and newborn"<br>OR "hemolytic disease of the foetus and newborn"<br>OR "haemolytic disease of the foetus and newborn"<br>OR "hemolytic disease of the newborn" OR<br>"haemolytic disease of the newborn" OR HDFN) OR<br>EMB.EXACT.EXPLODE("alloimmunization") OR<br>("maternal alloimmunization") OR ("red cell<br>alloimmunization")) | 12,499 <sup>a</sup>  |
| S2 | Intervention/treatment<br>setting | EMB.EXACT("intrauterine blood transfusion") OR<br>EMB.EXACT("fetal therapy") OR<br>EMB.EXACT.EXPLODE("neonatal intensive care<br>unit") OR MESH.EXACT.EXPLODE("Fetal<br>Therapies") OR MESH.EXACT("Intensive Care Units,<br>Neonatal") OR EMB.EXACT("immunoglobulin") OR<br>MESH.EXACT("Immunoglobulins, Intravenous") OR<br>EMB.EXACT.EXPLODE("plasma exchange") OR<br>MESH.EXACT.EXPLODE("Plasma Exchange") OR<br>("therapeutic plasma exchange") OR ("neonatal<br>transfusion") OR EMB.EXACT.EXPLODE("exchange<br>blood transfusion") OR ("neonatal exchange<br>transfusion"))                                                      | 233,001 <sup>a</sup> |

EMB.EXACT("mortality") OR EMB.EXACT("infant mortality") OR MESH.EXACT.EXPLODE("Infant Mortality") OR MESH.EXACT(Morbidity) OR EMB.EXACT(morbidity) OR MESH.EXACT.EXPLODE("Anemia, Neonatal") OR MESH.EXACT.EXPLODE("Hyperbilirubinemia") OR MESH.EXACT("Fetal Blood") OR MESH.EXACT("Perinatal Death") OR MESH.EXACT("Fetal Death") OR EMB.EXACT("newborn jaundice") OR EMB.EXACT("neonatal hyperbilirubinemia") OR EMB.EXACT("anemia") OR EMB.EXACT("hyperbilirubinemia") OR EMB.EXACT.EXPLODE("perinatal morbidity") OR EMB.EXACT("newborn death") OR EMB.EXACT("fetus death") OR EMB.EXACT("rhesus incompatibility") OR (late NEAR/3 anemia) OR TI,AB(complication\*) OR TI,AB(adverse /NEAR1 (effect\* OR reaction\* OR event\*)) OR MESH.EXACT("Hydrops Fetalis") OR EMB.EXACT.EXPLODE("edema") OR EMB.EXACT.EXPLODE("fetus hydrops") OR MESH.EXACT.EXPLODE("Premature Birth") OR EMB.EXACT.EXPLODE("prematurity") OR (emergency NEAR/2 childbirth OR delivery OR cesarean section) OR MESH.EXACT.EXPLODE("Respiration, Artificial") OR EMB.EXACT("artificial ventilation") OR

---

---

|    | MESH.EXACT("Heart Failure") OR |                                 |                    |
|----|--------------------------------|---------------------------------|--------------------|
|    | EMB.EXACT("heart failure")     |                                 |                    |
| S4 | Combined disease               | S1 AND S2                       | 1,903 <sup>b</sup> |
|    | state and outcomes of          |                                 |                    |
|    | interest                       |                                 |                    |
| S5 | Combined disease               | S1 AND S3                       | 3,619 <sup>b</sup> |
|    | state and outcomes of          |                                 |                    |
|    | interest                       |                                 |                    |
| S6 | Total hits                     | S4 OR S5                        | 5,069 <sup>a</sup> |
| S7 | Final hits published           | S6 AND publication date (>2004) | 2,518 <sup>b</sup> |
|    | between January 1,             |                                 |                    |
|    | 2005, and March 10,            |                                 |                    |
|    | 2021                           |                                 |                    |

---

<sup>a</sup>Duplicates were removed from the search but included in the result count.

<sup>b</sup>Duplicates were removed from the search and from the result count.

**Appendix S2.** Search Strategy for the Humanistic and Economic Burden

| #  | Description              | Search String                                                                                                                                                                                                                                                                                                                                                                                                                                                                                                                                                                                             | Hits    |
|----|--------------------------|-----------------------------------------------------------------------------------------------------------------------------------------------------------------------------------------------------------------------------------------------------------------------------------------------------------------------------------------------------------------------------------------------------------------------------------------------------------------------------------------------------------------------------------------------------------------------------------------------------------|---------|
| S1 | Disease state            | <p>(EMB.EXACT.EXPLODE("newborn hemolytic disease") OR MESH.EXACT.EXPLODE("Erythroblastosis, Fetal")) AND (TI,AB(HDFN OR ((hemolytic OR haemolytic) NEAR/3 (fetus OR newborn OR foetus)))) OR TI,AB("hemolytic disease of the fetus and newborn" OR "haemolytic disease of the fetus and newborn" OR "hemolytic disease of the foetus and newborn" OR "haemolytic disease of the foetus and newborn" OR "hemolytic disease of the newborn" OR "haemolytic disease of the newborn" OR HDFN) OR EMB.EXACT.EXPLODE("alloimmunization") OR ("maternal alloimmunization") OR ("red cell alloimmunization"))</p> | 12499*  |
| S2 | Intervention/ Tx setting | <p>EMB.EXACT("intrauterine blood transfusion") OR EMB.EXACT("fetal therapy") OR EMB.EXACT.EXPLODE("neonatal intensive care unit") OR MESH.EXACT.EXPLODE("Fetal Therapies") OR MESH.EXACT("Intensive Care Units, Neonatal") OR EMB.EXACT("immunoglobulin") OR MESH.EXACT("Immunoglobulins, Intravenous") OR EMB.EXACT.EXPLODE("plasma exchange") OR MESH.EXACT.EXPLODE("Plasma Exchange") OR ("therapeutic plasma exchange") OR ("neonatal transfusion") OR EMB.EXACT.EXPLODE("exchange blood transfusion") OR ("neonatal exchange transfusion"))</p>                                                      | 233001* |

|    |                     |                                                                                                                                                                                                                                                                                                                                                                                                                                                                                                                                                                                                                                                                                                                                                                                                                                                                                                                                                                                                                                                                                                                                                                                                                                                                                                                                                                                                                                                                                                   |          |
|----|---------------------|---------------------------------------------------------------------------------------------------------------------------------------------------------------------------------------------------------------------------------------------------------------------------------------------------------------------------------------------------------------------------------------------------------------------------------------------------------------------------------------------------------------------------------------------------------------------------------------------------------------------------------------------------------------------------------------------------------------------------------------------------------------------------------------------------------------------------------------------------------------------------------------------------------------------------------------------------------------------------------------------------------------------------------------------------------------------------------------------------------------------------------------------------------------------------------------------------------------------------------------------------------------------------------------------------------------------------------------------------------------------------------------------------------------------------------------------------------------------------------------------------|----------|
| S3 | Humanistic Outcomes | <p>EMB.EXACT("International Classification of Functioning, Disability and Health" OR "quality of life" OR "short form 36" OR "patient reported outcome" OR "patient preference" OR "questionnaire" OR "quality adjusted life years") OR</p> <p>EMB.EXACT.EXPLODE("health status indicator") OR</p> <p>MESH.EXACT("International Classification of Functioning, Disability and Health" OR "Quality of Life" OR "Value of Life" OR "Patient Reported Outcome Measures" OR "Patient Preference" OR Questionnaires OR "Quality-Adjusted Life Years") OR</p> <p>MESH.EXACT.EXPLODE("Health Status Indicators") OR</p> <p>TI,AB(burden OR (impact NEAR/3 (caregiver OR family OR families OR society OR societal or patient OR person)) OR "unmet need" OR "disability adjusted" OR DALY* OR "dartmouth coop" OR "Duke health profile" OR EQ OR (EURO NEAR/2 (QUAL OR QOL)) OR ((daily OR day) NEAR/3 activit*) OR "functional status" OR FSQ OR (function* NEAR/5 (reduc* OR impair* OR decrease* OR impact*)) OR "quality of life" OR QOL OR hrqol OR hrql OR hql OR hqol OR "hr qol" OR "h qol" OR "life quality" OR (health NEAR/3 (status OR indicator*)) OR "Nottingham health" OR NHP OR PQOL OR "perceived quality" OR QLS OR "quality of life scale" OR wellbeing OR "well being" OR QWB OR rosser OR SF OR "short form" OR "shortform*" OR "sickness impact" OR SIP OR "patient reported" OR "self reported" OR QALY* OR QALD* OR QALE* OR QTIME* OR (utilit* NEAR/3 (valu* OR measur* OR</p> | 4018894* |
|----|---------------------|---------------------------------------------------------------------------------------------------------------------------------------------------------------------------------------------------------------------------------------------------------------------------------------------------------------------------------------------------------------------------------------------------------------------------------------------------------------------------------------------------------------------------------------------------------------------------------------------------------------------------------------------------------------------------------------------------------------------------------------------------------------------------------------------------------------------------------------------------------------------------------------------------------------------------------------------------------------------------------------------------------------------------------------------------------------------------------------------------------------------------------------------------------------------------------------------------------------------------------------------------------------------------------------------------------------------------------------------------------------------------------------------------------------------------------------------------------------------------------------------------|----------|

|    |                   |                                                                                                                                                                                                                                                                                                                                                                                                                                                                                                                                                                                                                                                                                                                                                                                                                                                  |          |
|----|-------------------|--------------------------------------------------------------------------------------------------------------------------------------------------------------------------------------------------------------------------------------------------------------------------------------------------------------------------------------------------------------------------------------------------------------------------------------------------------------------------------------------------------------------------------------------------------------------------------------------------------------------------------------------------------------------------------------------------------------------------------------------------------------------------------------------------------------------------------------------------|----------|
|    |                   | <p>health OR life OR estimat* OR elicit* OR disease OR score* OR weight OR instrument OR instruments OR index)) OR “quality adjusted” OR “life year*” OR “health year*” OR disutilit* OR “willingness to pay” OR WTP OR (preference* NEAR/3 (valu* OR measur* OR health OR life OR estimat* OR elicit* OR disease OR score* OR instrument OR instruments OR index)) OR “healthy utility index” OR hui OR “standard gamble” OR “time trade off” OR “time tradeoff” OR TTO OR “health assessment questionnaire” OR “health assessment questionnaires” OR HAQ OR (humanistic AND burden))</p>                                                                                                                                                                                                                                                       |          |
| S4 | Economic Outcomes | <p>MESH.EXACT(“Cost of Illness” OR “Economics, Hospital” OR “Economics, Nursing” OR “Economics, Pharmaceutical” OR “Fees and Charges” OR “Economics, Dental” OR “Employer Health Costs” OR “Efficiency” OR “Presenteeism” OR “Absenteeism”) OR MESH.EXACT.EXPLODE(“Health Care Costs” OR “Health Expenditures” OR “Economics, Medical” OR “Salaries and Fringe Benefits”) OR EMB.EXACT(“cost of illness” OR “drug cost” OR “productivity” OR “medical leave” OR “presenteeism” OR “absenteeism”) OR EMB.EXACT.EXPLODE(“health care cost” OR “salary and fringe benefit”) OR TI,AB(presenteeism OR absenteeism OR (cost* NEAR/3 (medical OR direct OR indirect OR drug OR pharmaceutical OR hospital OR emergency OR outpatient OR inpatient OR ambulatory OR “primary care” OR practitioner OR device OR informal OR economic OR societal OR</p> | 2205185* |

|    |                                       |                                                                                                                                                                                                                                                                                                                                                                                                                                                                                                                                                                                                                                                                                                                                                                                                                                      |       |
|----|---------------------------------------|--------------------------------------------------------------------------------------------------------------------------------------------------------------------------------------------------------------------------------------------------------------------------------------------------------------------------------------------------------------------------------------------------------------------------------------------------------------------------------------------------------------------------------------------------------------------------------------------------------------------------------------------------------------------------------------------------------------------------------------------------------------------------------------------------------------------------------------|-------|
|    |                                       | intangible OR caregiver OR physician OR specialist OR healthcare OR "health care" OR annual* OR clinic) OR ((burden OR impact) NEAR/3 (cost OR costs OR economic OR economics OR caregiver OR caregivers OR family OR families OR society OR societal OR employee OR employer)) OR (los* AND work AND day*) OR "sick day" OR "sick leave" OR "sickness absence" OR "work absence" OR "work incapacity" OR "work leave" OR "disability absence" OR ((resource OR healthcare OR "health care") NEAR/5 (use OR utilization OR utilisation)) OR ((visit* OR admission* OR readmission* OR stay* OR day*) NEAR/3 (physician OR emergency OR specialist OR outpatient OR inpatient OR "primary care" OR practitioner OR hospital OR clinic)) OR hospitalization OR hospitalisation OR "length of stay" OR "LOS" OR (burden AND financial)) |       |
| S5 | Combined disease                      | S1 AND S2                                                                                                                                                                                                                                                                                                                                                                                                                                                                                                                                                                                                                                                                                                                                                                                                                            | 1903° |
| S6 | state and outcomes of                 | S1 AND S3                                                                                                                                                                                                                                                                                                                                                                                                                                                                                                                                                                                                                                                                                                                                                                                                                            | 329°  |
| S7 | interest                              | S1 AND S4                                                                                                                                                                                                                                                                                                                                                                                                                                                                                                                                                                                                                                                                                                                                                                                                                            | 344°  |
| S8 | Total Hits                            | S5 OR S6 OR S7                                                                                                                                                                                                                                                                                                                                                                                                                                                                                                                                                                                                                                                                                                                                                                                                                       | 2387° |
| S9 | Final hits published on or after 2005 | S8 and PD(>2004)                                                                                                                                                                                                                                                                                                                                                                                                                                                                                                                                                                                                                                                                                                                                                                                                                     | 1441° |

\* Duplicates are removed from the search but included in the result count.

° Duplicates are removed from the search and from the result count.
